# Supplementary material for: Dexamethasone treatment alters insulin, leptin, and adiponectin levels in male mice as observed in DIO but does not lead to alterations of metabolic phenotypes in the offspring
Source: Springer Nature journal article supplement (doi:10.1007/s00335-015-9616-5), 2015-12-11

# Supplementary Figure S2

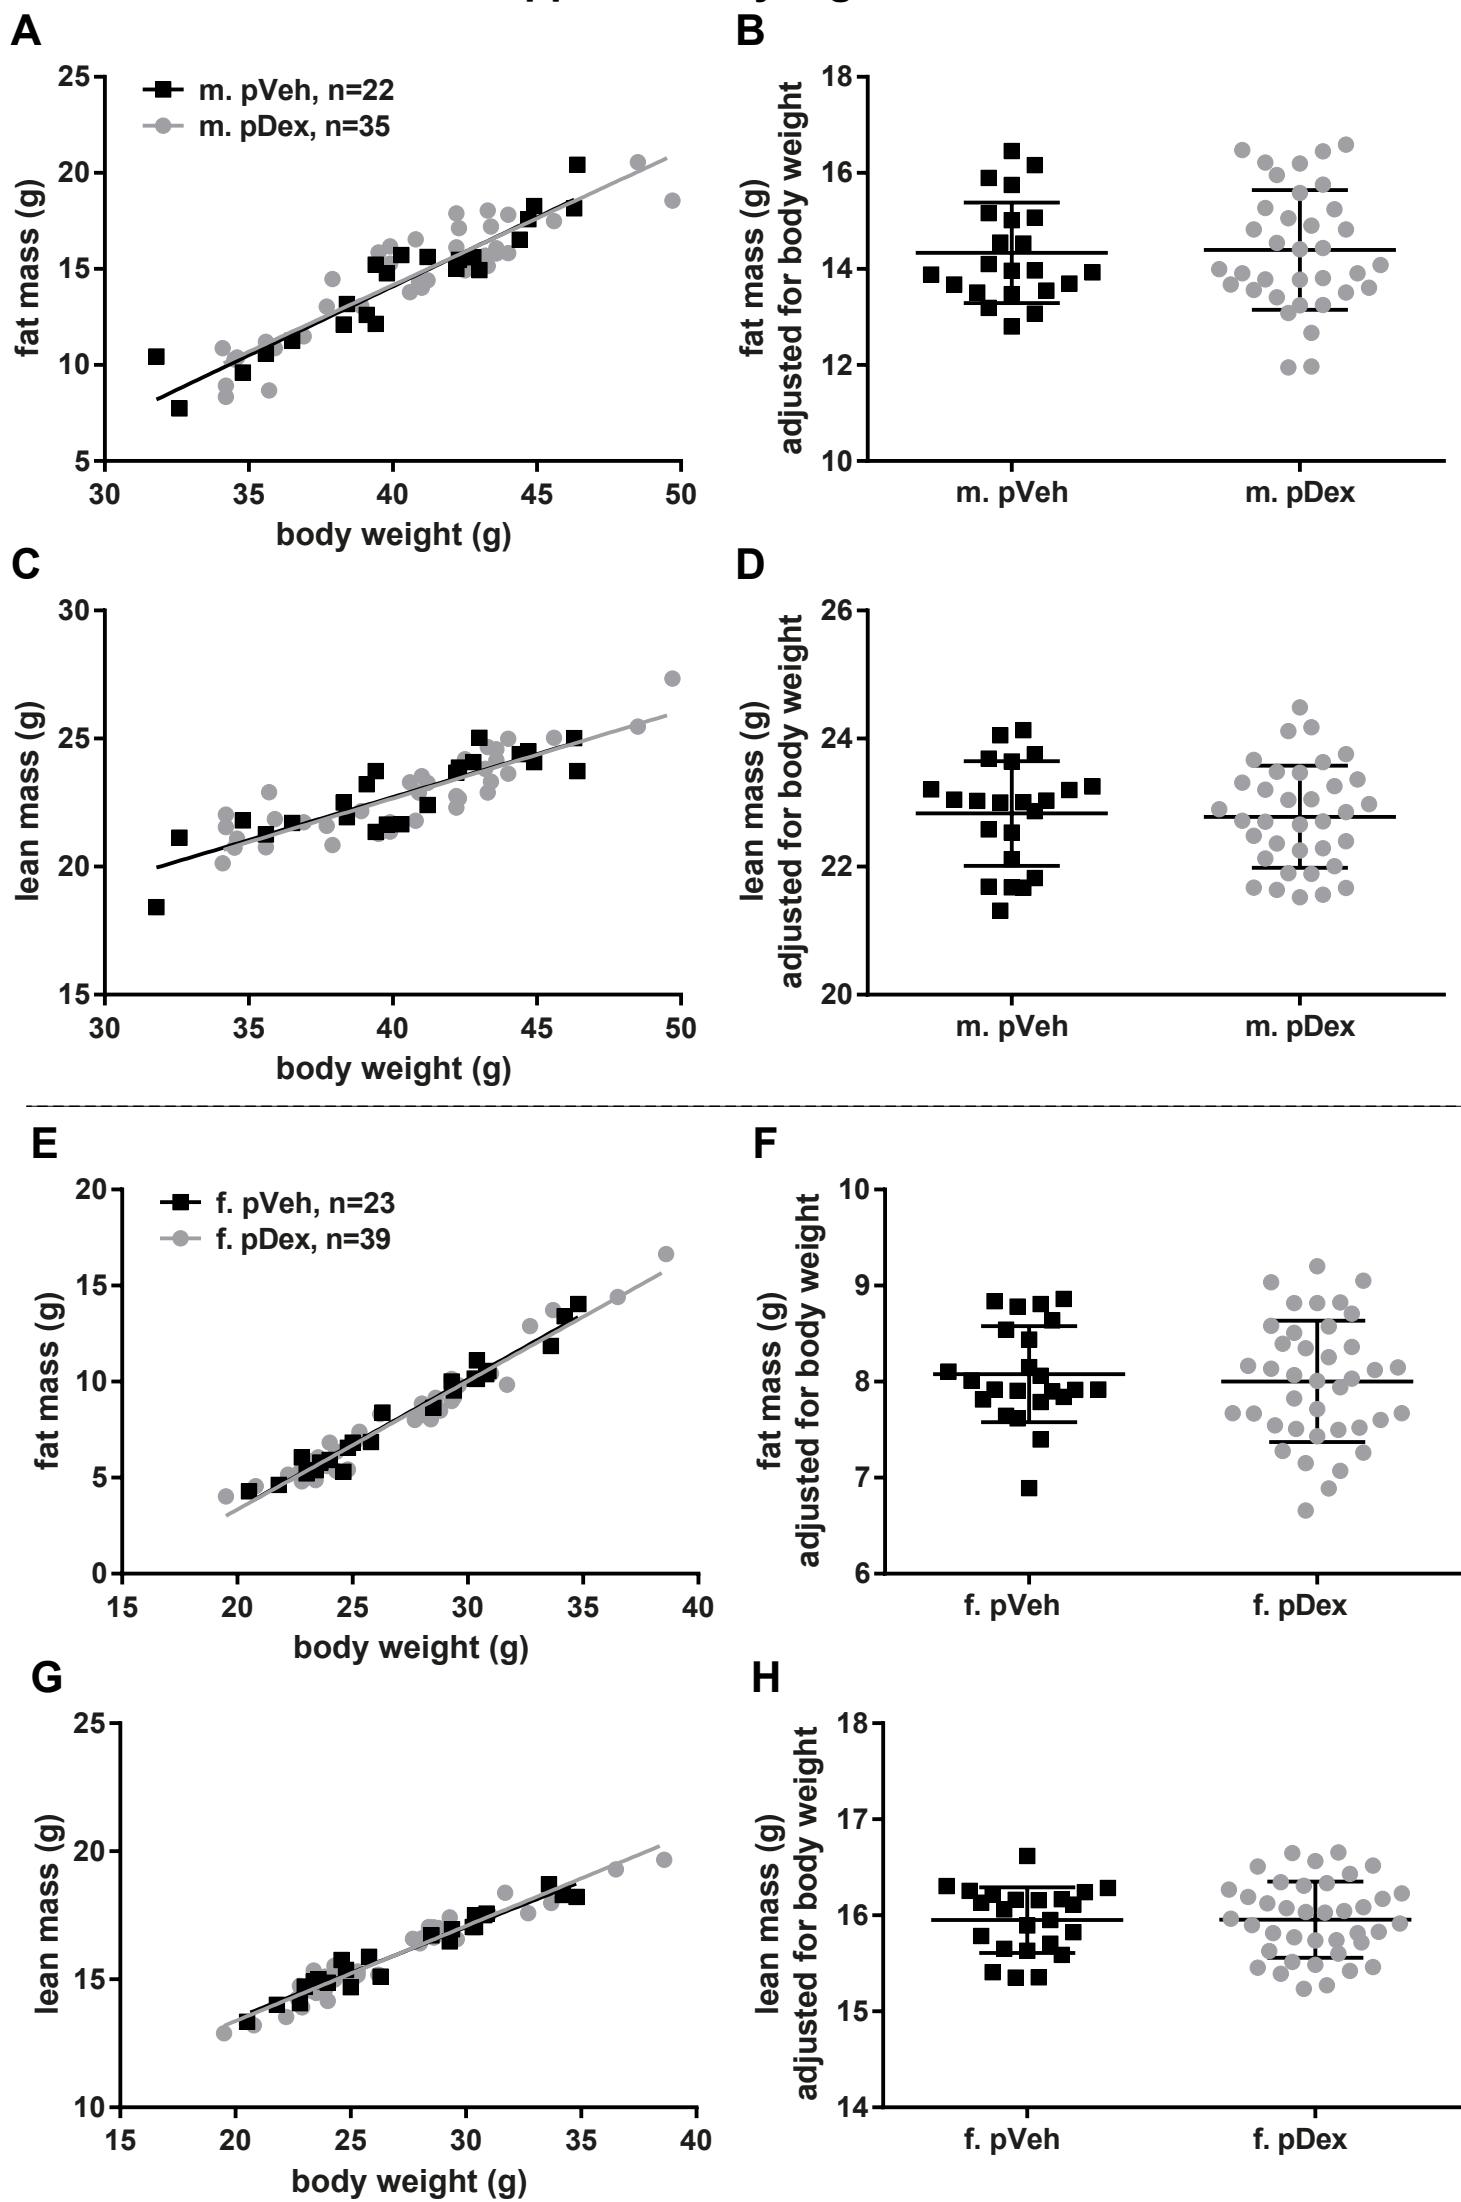

Supplement: MOESM2 [file 335_2015_9616_MOESM2_ESM.pdf › 335_2015_9616_MOESM2_ESM.pdf]
